# Supplementary material
Source: PubMed Central journal article supplement (PMC4314337)

Funnel Plot of Standard Error by Hedges's g

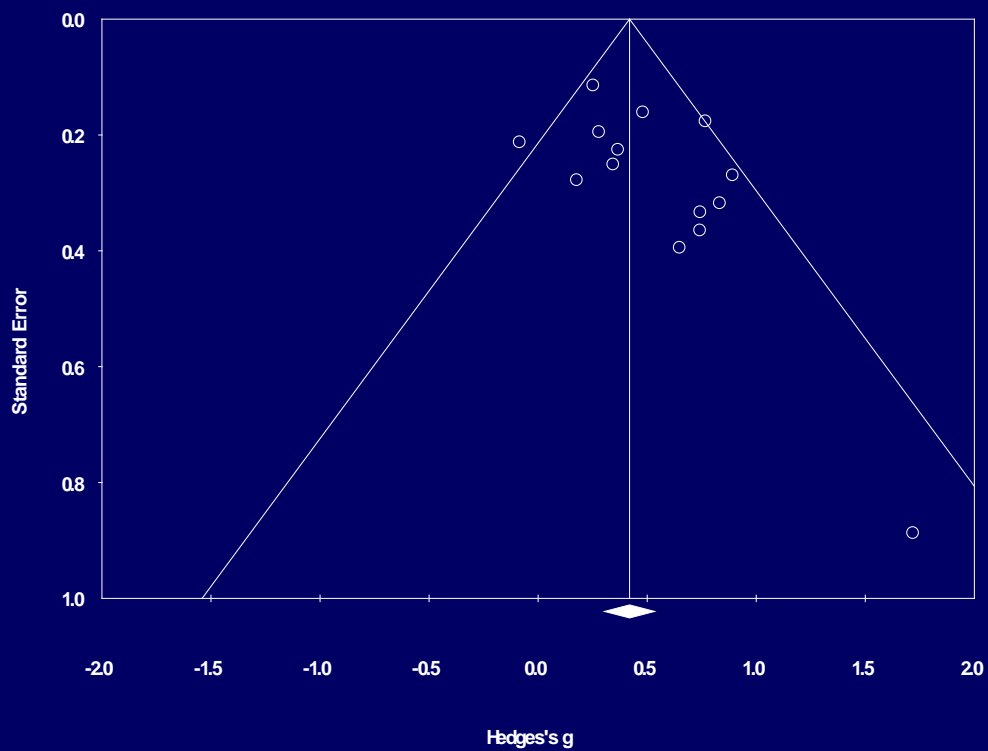

Funnel Plot of Standard Error by Hedges's g

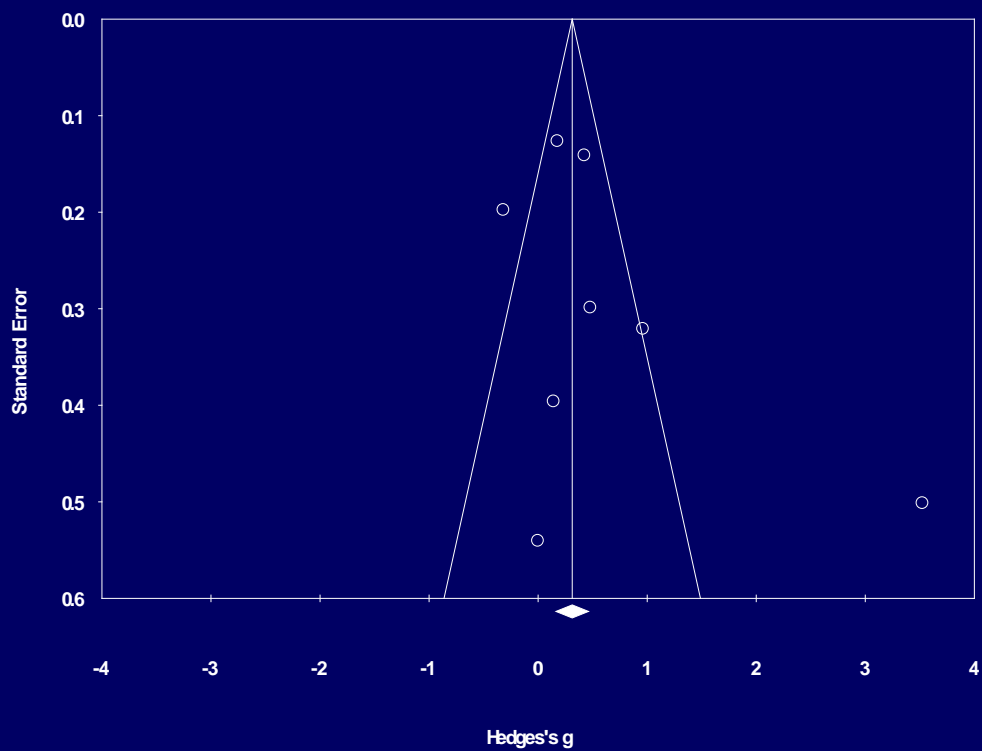

Funnel Plot of Standard Error by Hedges's g

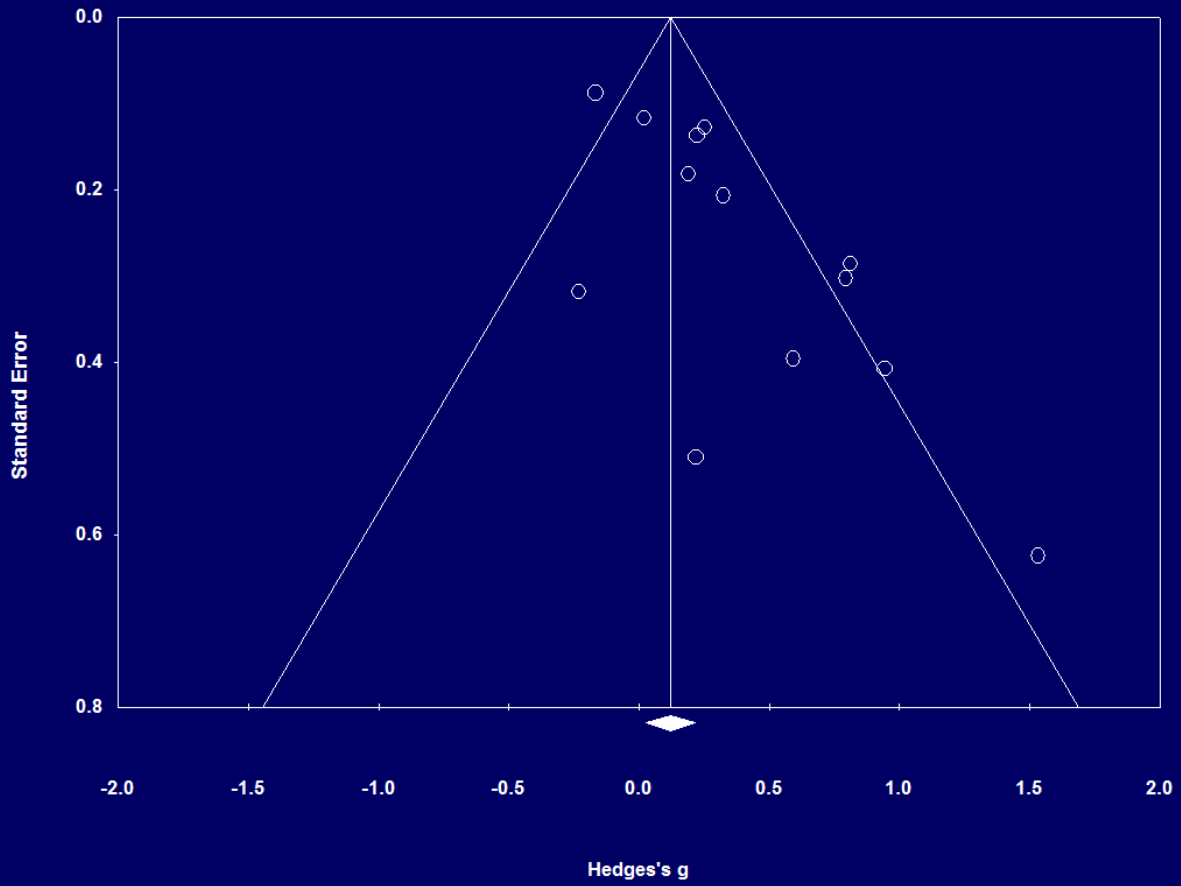

Supplement: NIHMS644150-supplement.pdf [file NIHMS644150-supplement.pdf]
